# Supplementary material for: Reprogramming Captures the Genetic and Tumorigenic Properties of Neurofibromatosis Type 1 Plexiform Neurofibromas
Source: PubMed Central journal article supplement — Stem Cell Reports. 2019 Jan 31;12(2):411–26. doi: 10.1016/j.stemcr.2019.01.001 (PMC6373434; doi:10.1016/j.stemcr.2019.01.001), 2019-01-31
Supplement: mmc1.pdf [file mmc1.pdf]

**Stem Cell Reports, Volume 12**

**Supplemental Information**

**Reprogramming Captures the Genetic and Tumorigenic Properties of  
Neurofibromatosis Type 1 Plexiform Neurofibromas**

**Merixell Carrió, Helena Mazuelas, Yvonne Richaud-Patin, Bernat Gel, Ernest Terribas, Imma Rosas, Senda Jimenez-Delgado, Josep Biayna, Leen Vendredy, Ignacio Blanco, Elisabeth Castellanos, Conxi Lázaro, Ángel Raya, and Eduard Serra**

**FIGURE S1**

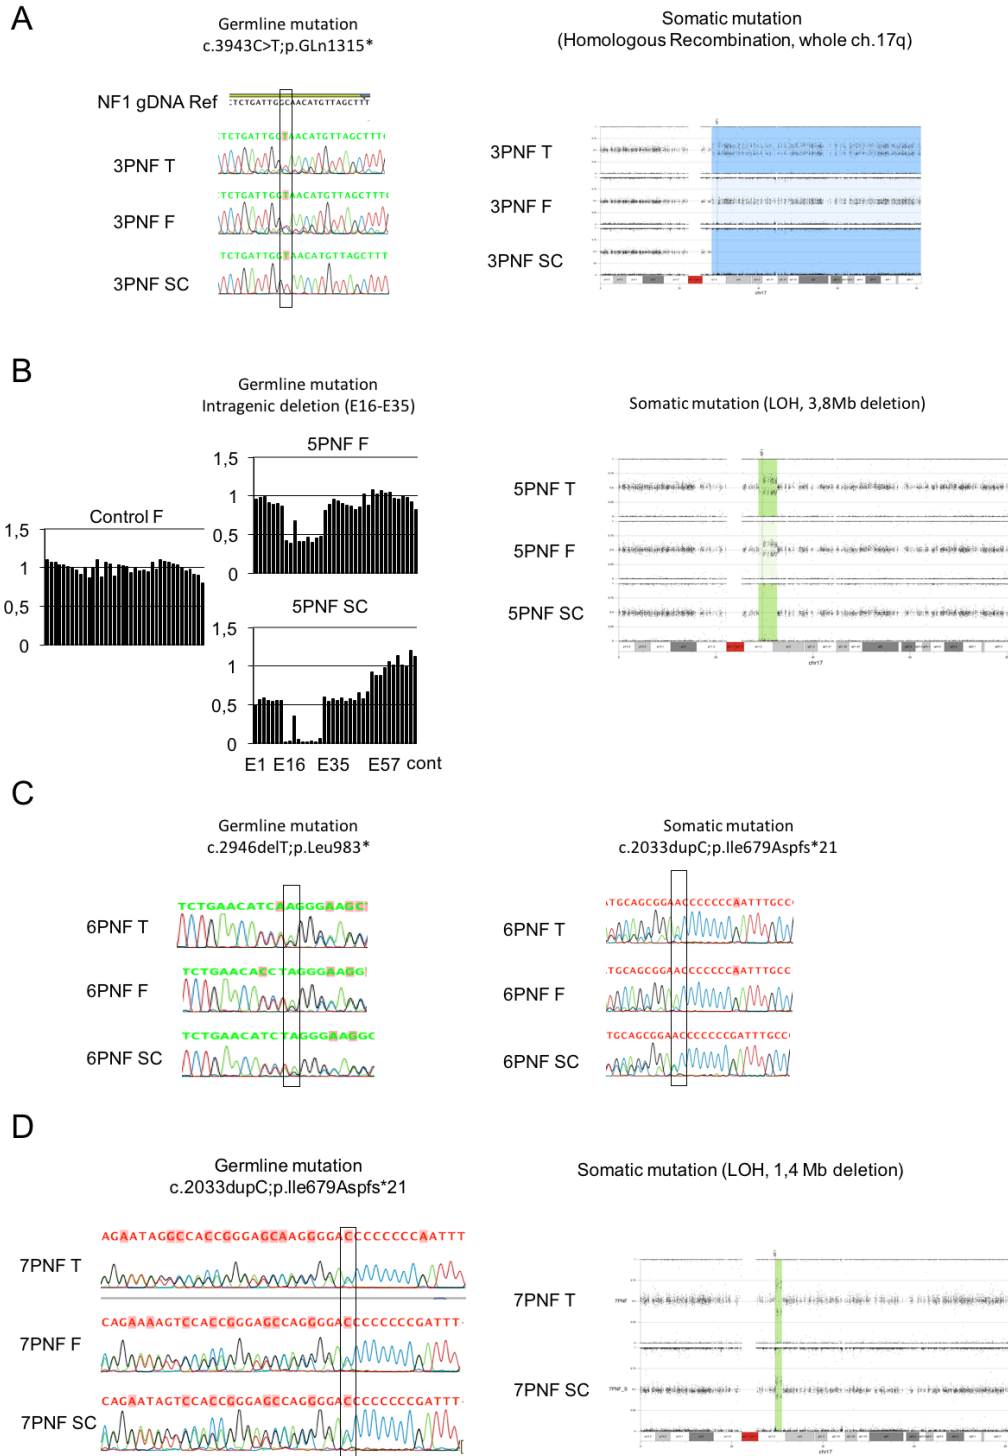

**Figure S1. *NFI* germline and somatic mutation analysis in the four PNFs used to generate the banked iPSC lines.**

**A) 3PNF *NFI* mutational analysis.** Left: Sanger sequencing showing the germline mutation c.3943C>T;p.Gln1315\* in the *NFI* gene. The germline mutation is present in the tumor (3PNF T), in tumor fibroblasts (3PNF F) and in tumor SC (3PNF SC). Right: B-allele frequency (BAF) data (a detailed view from chromosome 17) from SNP-array analysis showing the somatic mutation of 3PNF. Somatic *NFI* inactivation is produced by mitotic recombination generating CN-LOH in 17q and the reduction to homozygosity for the constitutional *NFI* mutation. LOH is observed in 3PNF and in 100% of cells in 3PNF SC. Fibroblast culture (3PNF F) is an early passage and still exhibit a residual LOH due to the presence of tumor SCs.

**B) 5PNF *NFI* mutational analysis.** Left: MLPA analysis showing an intragenic deletion in the *NFI* gene, from exon 16 (E16) to exon 57 (E57). The deletion is detected in tumor fibroblasts (5PNF F) and in tumor SC (5PNF SC). Right: detailed view of BAF for chromosome 17. Somatic *NFI* inactivation is produced by a deletion generating CN-LOH in 17q and the reduction to homozygosity for the constitutional *NFI* mutation. LOH is observed in 5PNF and in 100% of cells in 5PNF SC.

**C) 6PNF *NFI* mutational analysis.** Left: Sanger sequencing showing the germline mutation c.2946delT;p.Leu983\* present in the tumor (6PNF T), tumor fibroblasts (6PNF F) and tumor SCs (6PNF SC). Right: sanger sequencing showing the somatic mutation c.2033dupC;p.Ile679Asp\*21 only present 6PNF SC and not in 6PNF F.

**D) 7PNF *NFI* mutational analysis.** Left: Sanger sequencing showing the germline mutation c.2033dupC;p.Ile679Asp\*21 present in the tumor (7PNF T), tumor fibroblasts (7PNF F) and tumor SC (7 PNF SC). Right: detailed view of BAF for chromosome 17. Somatic *NFI* inactivation is produced by a deletion generating CN-LOH in 17q. LOH is observed in 7PNF and in 7PNF SC.

**FIGURE S2**

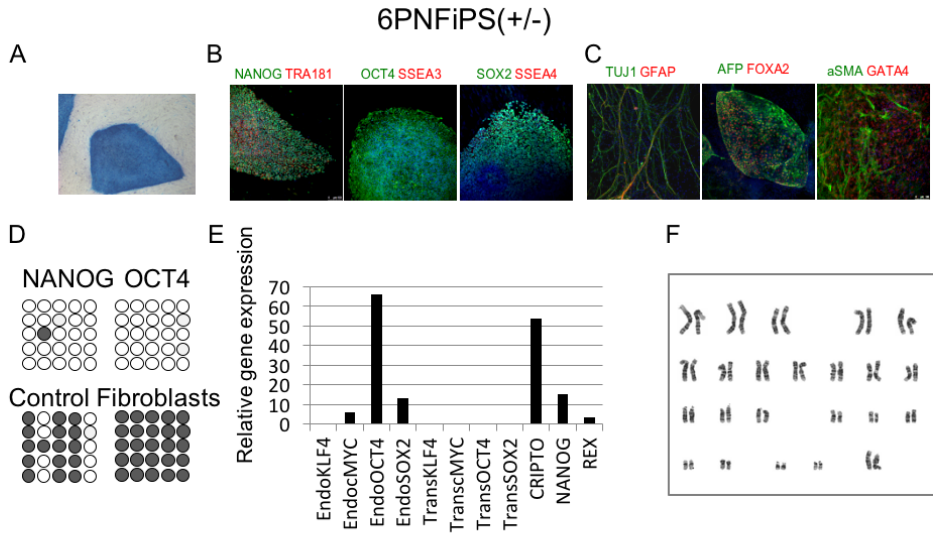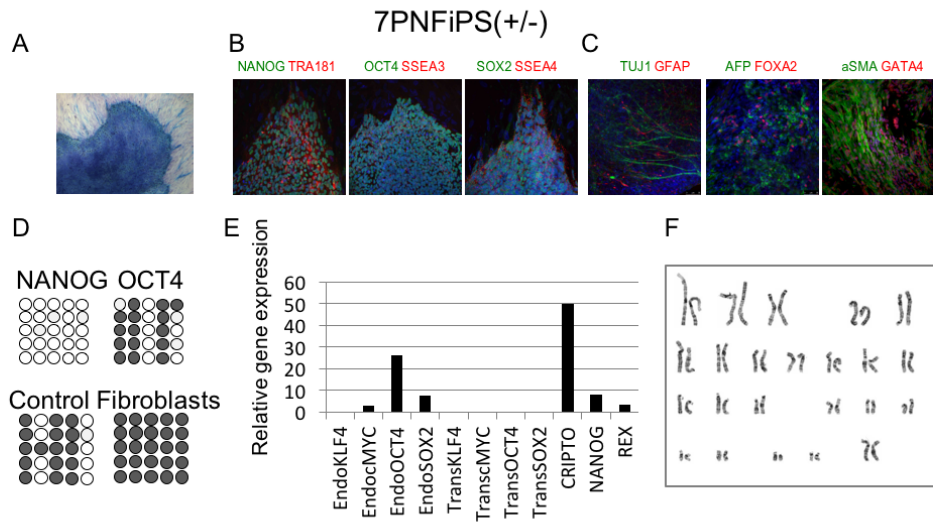

**G**

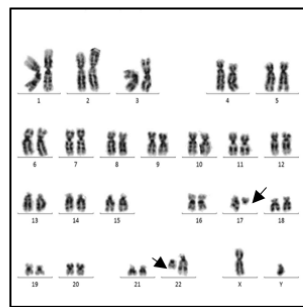

5PNF SC passage 3  
46,XY,t(17;22)(q10;q13.3)

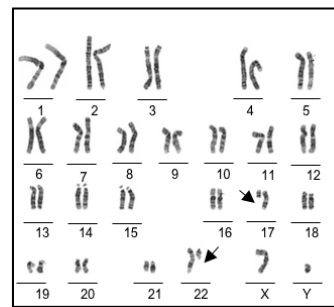

5PNFiPS (NF1-/-) passage 20  
46,XY,t(17;22)(q10;q13.3)

**Figure S2. iPSC Characterization of the additional banked NF1 iPSCs lines.**

- A)** Morphology and alkaline phosphatase staining of a representative colony. Scale bar: 100µm
- B)** Pluripotency markers. Scale bar: 100µm
- C)** *In vitro* differentiation potential. Scale bar: 100µm
- D)** Bisulphite sequencing showing demethylation of the *NANOG* and *POU5F1*(OCT4) promoters.
- E)** RT-qPCR analysis characterizing the expression levels of reprogramming genes either endogenous (iPSC) or retroviral-derived (transgenes). Expression of pluripotency markers (CRIPTO, NANOG, REX) are also shown.
- F)** karyotypes at passage 20.
- G)** Karyotype of the 5PNF-derived SCs (5PNF SC) showing the presence of the same translocation t(17;22) as in the 5PNFiPS N(-/-) cell line that causes the somatic *NF1* mutation.

FIGURE S3

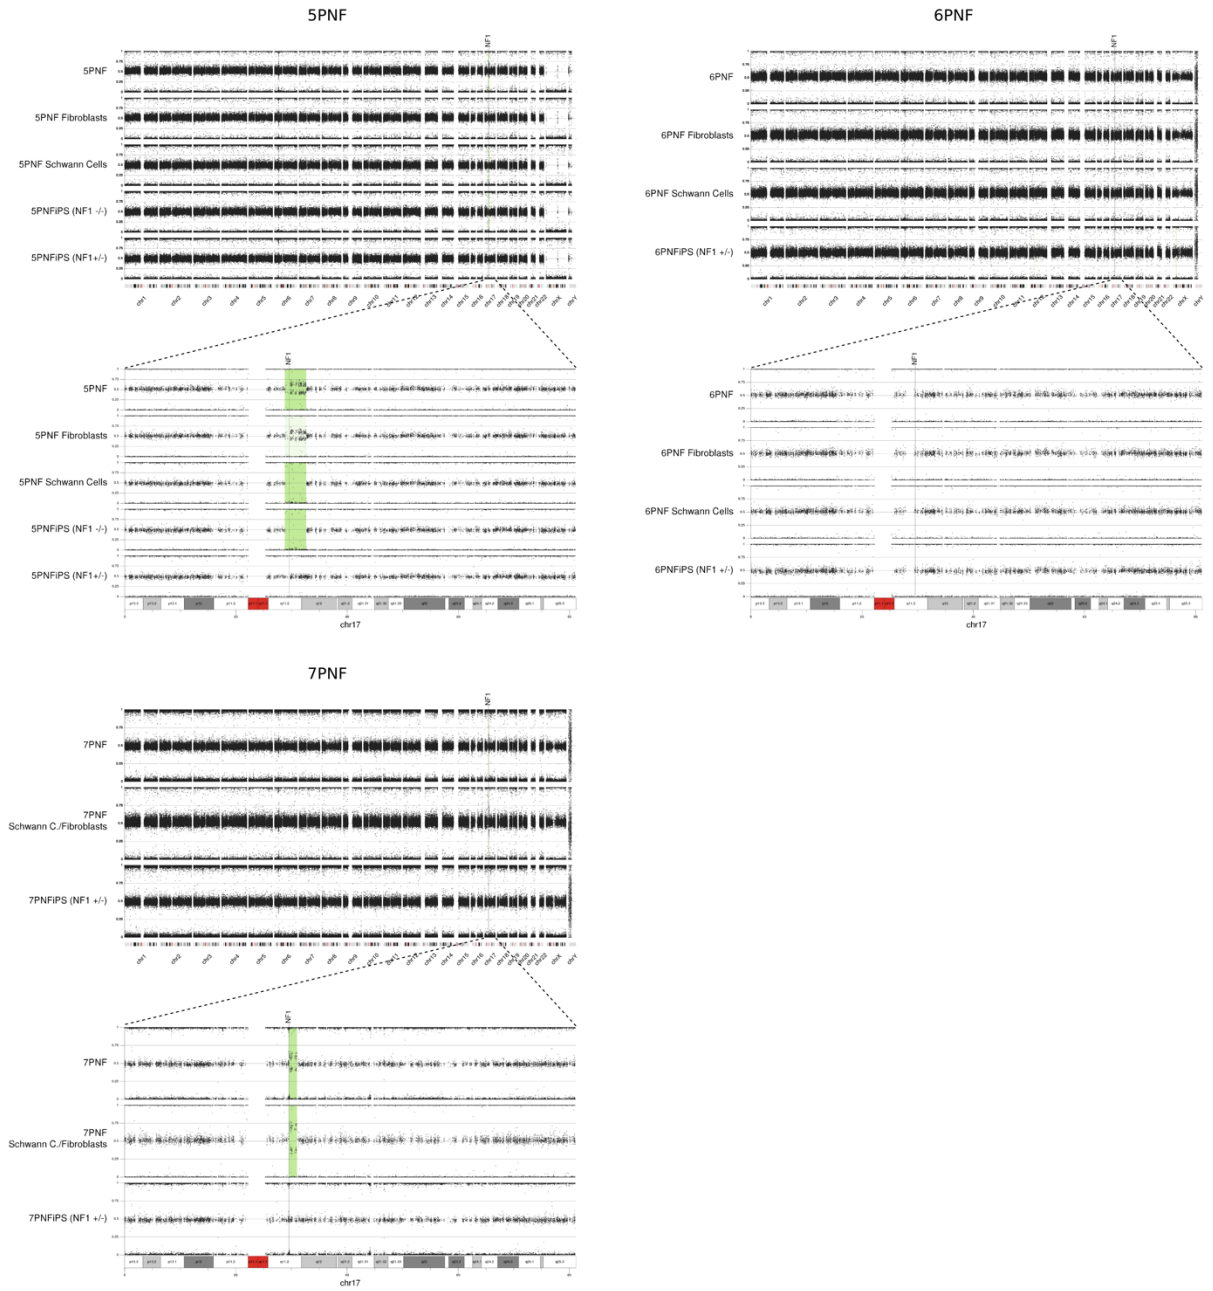

Figure S3. Genomic characterization of tumors, tumor isolated cells and corresponding iPSC lines.

B-allele frequency (BAF) data along the genome is plotted for all samples associated to each PNF. Green shaded regions denote somatic LOH due to genomic loss. Fibroblast cultures from tumor 5PNF are early passages in which LOH can still be detected due to the presence of *NFI*(-/-) Schwann cells. 7PNF Schwann cells/Fibroblasts is a heterogeneous cell culture (60% SC and 40% fibroblasts). The position of *NFI* is marked with a vertical black line.

**FIGURE S4**

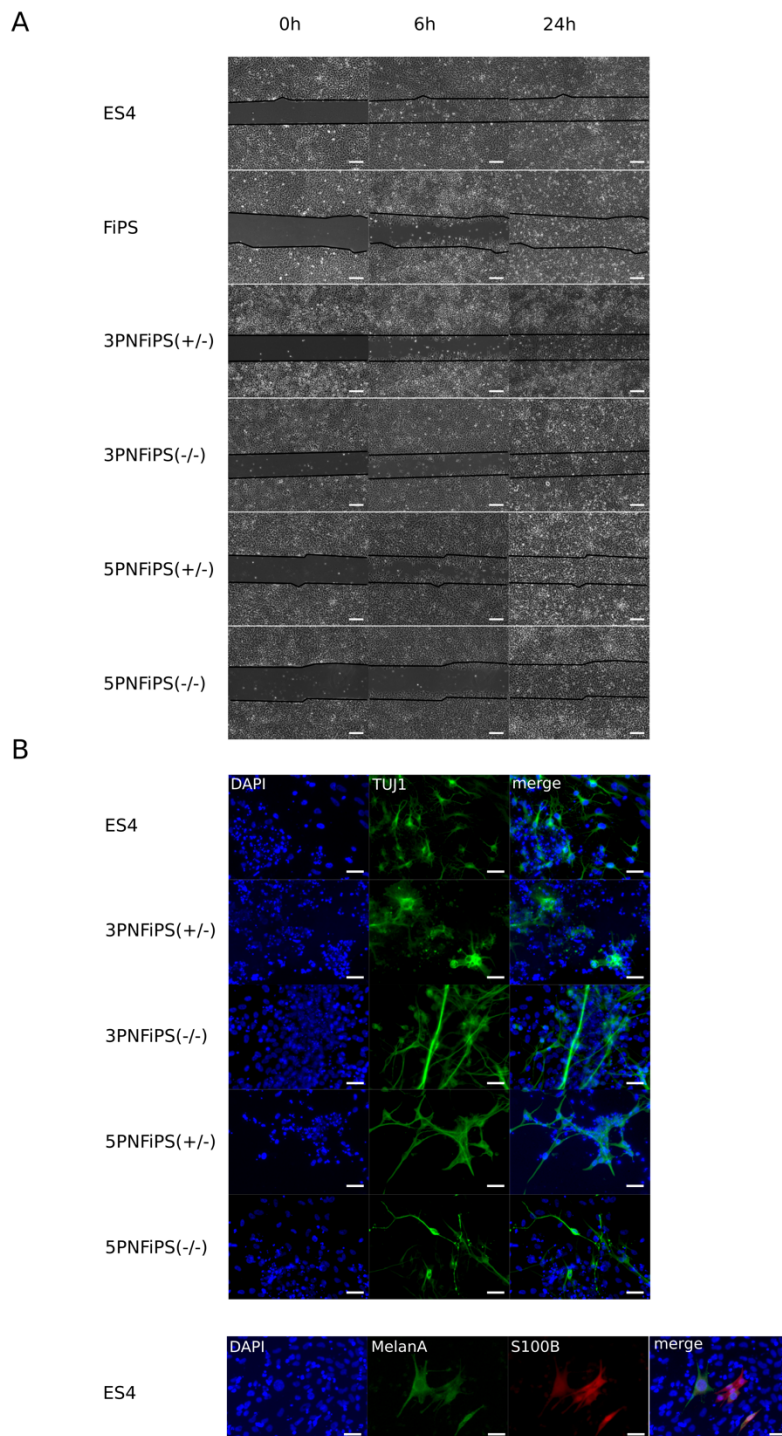

**Figure S4. iPSC-derived NCSC lines have the capacity to migrate and differentiate into different NC-derivatives.**

**A)** Scratch assay. A cell free-free gap was created using a pipette tip and migration capacity was measured by taking images of the same region at 6 and 24 hours after gap creation. Scale bar= 150 $\mu$ M.  
**B)** Differentiation capacity of generated NC towards peripheral neurons (Tuj1+) and melanocytes (MelanA+ and S100B+). Scale bar= 50 $\mu$ M.

**FIGURE S5**

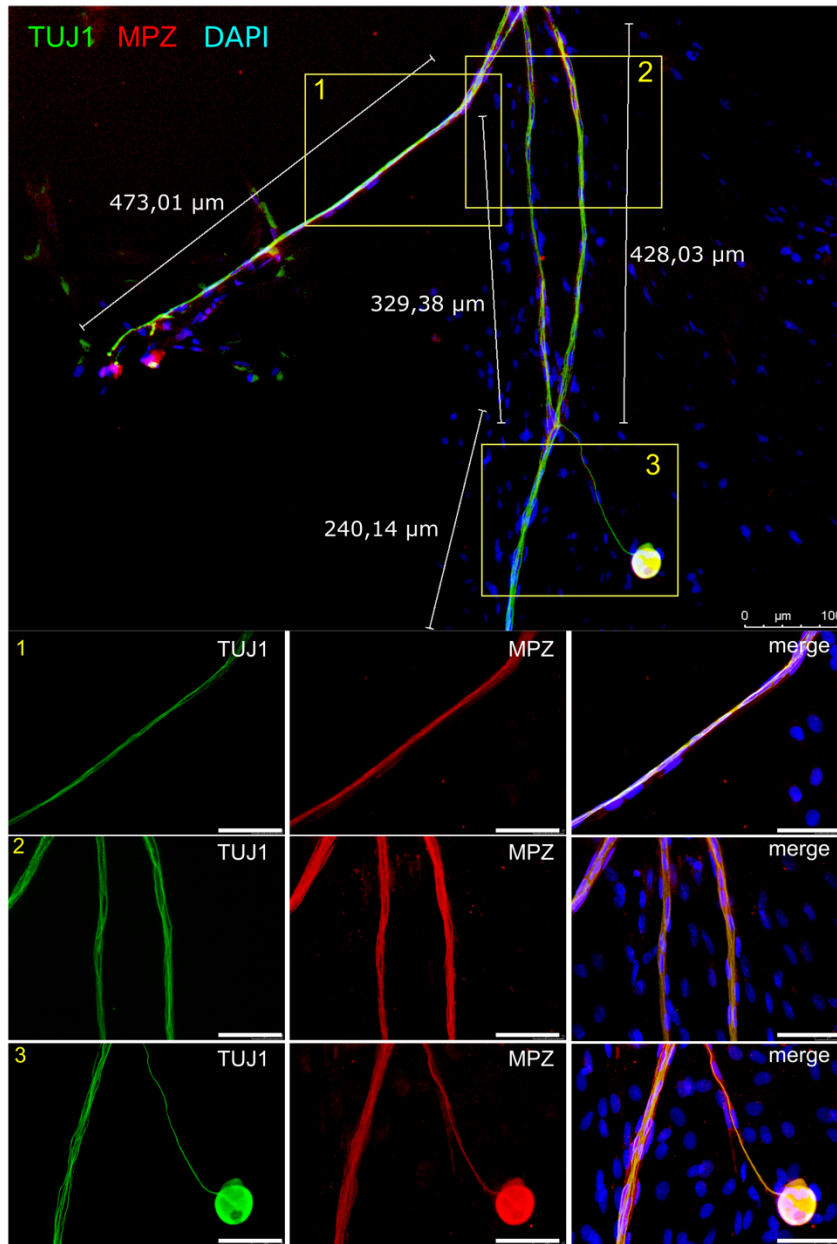

**FIGURE S5.** Myelin quantification of FiPS-differentiated SC.

The myelination capacity of FiPS-differentiated SCs was assessed by co-culturing cells at 7 days of differentiation with rat DRG neurons for 30 days. SC specification and myelination was measured by immunostaining for TUJ1 (green) and MPZ (red). The length of myelinated axons was measured using LEICA LASAF software and are marked by a white line. Scale bar: 50μm.



TABLE S1. Reprogramming information

| TUMOR INFORMATION | REPROGRAMMING INFORMATION |                                                                     |                |              |         |                        |                                 |
|-------------------|---------------------------|---------------------------------------------------------------------|----------------|--------------|---------|------------------------|---------------------------------|
| Tumor ID          | Method                    | Reprogrammed cell                                                   | Num. of clones | NF1 mutation |         | iPSC LINE BANKING NAME |                                 |
|                   |                           |                                                                     |                | Germline     | Somatic |                        |                                 |
|                   |                           |                                                                     |                |              | yes     |                        | No                              |
| 3PNF              | Rv                        | PNF skin fibroblasts*                                               | 7              | 7            | 7*      |                        |                                 |
|                   |                           | PNF Schwann cells                                                   | 10             | 10           | 10      |                        |                                 |
|                   | Sv                        | PNF skin fibroblasts*                                               | 9              | 9            |         | 2                      | 3PNFiPS(+/-)<br>3PNF_FiPSsv_PM  |
|                   |                           | PNF Schwann cells                                                   | 12             | 12           | 12      |                        | 3PNFiPS(-/-)<br>3PNF_SiPSsv_MM  |
| 5PNF              | Rv                        | PNF endoneurial fibroblasts                                         | 0              |              |         |                        |                                 |
|                   |                           | PNF Schwann cells                                                   | 2              | 2            | 2       |                        | 5PNFiPS(-/-)_Rv                 |
|                   | Sv                        | Digested PNF                                                        | 12             | 12           |         | 1                      | 5PNFiPS(+/-)<br>5PNF_TDiPSsv_PM |
|                   |                           |                                                                     |                |              | 11      |                        | 5PNFiPS(-/-)<br>5PNF_TDiPSsv_MM |
| 6PNF              | Rv                        | PNF endoneurial fibroblasts                                         | 1              | 1            | 0       | 1                      | 6PNFiPS(+/-)_Rv                 |
|                   |                           | PNF Schwann cells                                                   | 10             | 10           | 0       | 10                     | 6PNFiPS(+/-)<br>6PNF_SiPSrv_PM  |
|                   | Sv                        | Digested PNF                                                        | 10             | 10           | 0       | 10                     |                                 |
| 7PNF              | Rv                        | PNF endoneurial fibroblasts                                         | 1              | 1            | 0       | 1                      |                                 |
|                   |                           | Mix population T(40% PNF Schwann cell, 60% endoneurial fibroblasts) | 12             | 12           | 0       | 12                     | 7PNFiPS(+/-)<br>7PNF_TDiPSrv_PM |
| 13PNF             | Sv                        | PNF endoneurial fibroblasts                                         | 11             | 11           | 0       | 11                     | 13PNFiPS(+/-)                   |
|                   |                           | PNF Schwann cells                                                   | 40             | 40           | 0       | 40                     | 13PNFiPS(+/-)                   |
|                   |                           | Digested PNF                                                        | 27             | 27           | 0       | 27                     |                                 |

\*The skin used was covering the PNF. When skin was separated, part of the tumor was still left.

**TABLE S2.** Sample authentication.

| <b>AmpFISTR<br/>Identifiler loci</b> | <b>3PNF</b> | <b>5PNF</b> | <b>6PNF</b> | <b>7PNF</b> |
|--------------------------------------|-------------|-------------|-------------|-------------|
| CSF1PO                               | 11,14       | 10          | 10,12       | 11,13       |
| D2S1338                              | 17,24       | 17,19       | 17,23       | 24          |
| D3S1358                              | 15,16       | 15,16       | 16,18       | 15,17       |
| D5S818                               | 10,11       | 12,13       | 11,13       | 10,12       |
| D7S820                               | 10          | 10,13       | 11          | 8,12        |
| D8S1179                              | 10,14       | 8,13        | 10,12       | 13,14       |
| D13S317                              | 8,13        | 8,12        | 11,14       | 8,13        |
| D16S539                              | 9,12        | 12,13       | 9,13        | 11,12       |
| D18S51                               | 13,15       | 15,16       | 11,13       | 12,15       |
| D19S433                              | 12,14.2     | 14,15       | 13,14       | 13,15       |
| D21S11                               | 30,32.2     | 29          | 29,30.2     | 29,30       |
| FGA                                  | 21,24       | 21,23       | 21,27       | 20,25       |
| THO1                                 | 8,9.3       | 9,3         | 7,9.3       | 6,9.3       |
| TPOX                                 | 8           | 10,11       | 9,11        | 10,11       |

**TABLE S3.** List of somatic mutations.

The list includes all somatic mutations identified in each sample, meeting the following criteria: exonic or present in canonical splice sites, passing manual validation and excluding synonymous mutations. The list includes only non-*NFI* mutations.

**See attached Supplemental\_Table\_S3.xls**

**TABLE S4.** Primers for RT-qPCR.

| <b>Gene</b>      | <b>Sequence(5'-3')</b> |                           | <b>UPL</b> |
|------------------|------------------------|---------------------------|------------|
| <i>POU5F1</i>    | <i>Forward</i>         | cttcgcaagccctcatttc       | 60         |
|                  | <i>Reverse</i>         | gagaaggcgaatccgaag        |            |
| <i>POU3F1</i>    | <i>Forward</i>         | ttctcaagtgcccaagc         | 78         |
|                  | <i>Reverse</i>         | ccggttgacagaaccagac       |            |
| <i>NGFR</i>      | <i>Forward</i>         | ccttcacgctgtctcca         | 60         |
|                  | <i>Reverse</i>         | cctaggcaagcatccatc        |            |
| <i>SOX10</i>     | <i>Forward</i>         | gacacggttttccacttcta      | 25         |
|                  | <i>Reverse</i>         | gtcctcgcaagagtgccaac      |            |
| <i>TFAP2A</i>    | <i>Forward</i>         | ggtgaacccaacgaagtc        | 73         |
|                  | <i>Reverse</i>         | accgtgacctgtacttcgag      |            |
| <i>S100B</i>     | <i>Forward</i>         | ggaaggggtgagacaagga       | 73         |
|                  | <i>Reverse</i>         | ggtggaaaacgtcgatgag       |            |
| <i>CDH19</i>     | <i>Forward</i>         | tgtaccagaggaaatgaatacgac  | 78         |
|                  | <i>Reverse</i>         | catatatgtcacctgtctttcatca |            |
| <i>ITGA4</i>     | <i>Forward</i>         | atgcaggatcggaaagaatc      | 78         |
|                  | <i>Reverse</i>         | ccacaagggtctccattaggg     |            |
| <i>PLP1</i>      | <i>Forward</i>         | cttcaacacctggaccacct      | 60         |
|                  | <i>Reverse</i>         | ccatgggagaacaccataca      |            |
| <i>GAP43</i>     | <i>Forward</i>         | gctccaagcctgatgagc        | 12         |
|                  | <i>Reverse</i>         | gctctgtggcagcatcac        |            |
| <i>EGR2</i>      | <i>Forward</i>         | gctgctaccagaaggcata       | 60         |
|                  | <i>Reverse</i>         | ggatgaggctgtgggtgaa       |            |
| <i>PMP22</i>     | <i>Forward</i>         | ctgtcgatcatcttcagattc     | 29         |
|                  | <i>Reverse</i>         | agcactcatcacgcacagac      |            |
| <i>MPZ</i>       | <i>Forward</i>         | ttccatctcctgcatcc         | 55         |
|                  | <i>Reverse</i>         | ctgggccacctggtagag        |            |
| <i>EndoKLF4</i>  | <i>Forward</i>         | agcctaataatgatggtgcttgggt | 68         |
|                  | <i>Reverse</i>         | ttgaaaactttggcttcttgtt    |            |
| <i>EndoMYC</i>   | <i>Forward</i>         | cgggcgggcactttg           | 55         |
|                  | <i>Reverse</i>         | ggagagtcgctccttgct        |            |
| <i>EndoOCT4</i>  | <i>Forward</i>         | gggttttgggattaagtcttca    | 63         |
|                  | <i>Reverse</i>         | gccccaccctttgtgtt         |            |
| <i>EndoSOX2</i>  | <i>Forward</i>         | caaaaatggccatgcaggtt      | 63         |
|                  | <i>Reverse</i>         | agtgggatcgaacaaaagctatt   |            |
| <i>TransKLF4</i> | <i>Forward</i>         | tggactacaaggacgacgatga    | 60         |
|                  | <i>Reverse</i>         | cgtcgctgacagccatga        |            |
| <i>TransMYC</i>  | <i>Forward</i>         | tggactacaaggacgacgatga    | 77         |
|                  | <i>Reverse</i>         | gttctgttgggaagctaactgt    |            |
| <i>TransOCT4</i> | <i>Forward</i>         | tggactacaaggacgacgatga    | 58         |
|                  | <i>Reverse</i>         | caggtgtcccgccatga         |            |
| <i>TransSOX2</i> | <i>Forward</i>         | gctcgaggtaacgaattcatgt    | 57         |
|                  | <i>Reverse</i>         | gcccggcggcttca            |            |
| <i>CRIPTO</i>    | <i>Forward</i>         | cggactgtgagcacgatgt       | 66         |
|                  | <i>Reverse</i>         | gggcagccaggtgtcatg        |            |
| <i>NANOG</i>     | <i>Forward</i>         | acaactggccgagaatagca      | 63         |
|                  | <i>Reverse</i>         | ggttcccagtcgggttcac       |            |
| <i>REX</i>       | <i>Forward</i>         | cctgcaggcggaaatagaac      | 61         |
|                  | <i>Reverse</i>         | gcacacatagccatcacataagg   |            |

**TABLE S5.** Antibody list.

| <b>Antibody</b>                                            | <b>Supplier</b>           | <b>Reference</b> | <b>Dilution</b>             |
|------------------------------------------------------------|---------------------------|------------------|-----------------------------|
| Rabbit anti-NF1                                            | Bethyl laboratories       | A300-140A        | 1:1000 (WB)                 |
| Mouse IgG anti-OCT3/4                                      | Santa Cruz Biotechnology  | Sc-5279          | 1:60                        |
| Rabbit IgG anti-SOX2                                       | Pierce Antibodies         | PA1-16968        | 1:100                       |
| Goat IgG anti-NANOG                                        | R&D Systems               | AF1997           | 1:25                        |
| Rat IgM anti-SSEA3                                         | Hybridoma Bank            | MC-631           | 1:3                         |
| Mouse IgG anti-SSEA4                                       | Hybridoma Bank            | MC-813-70        | 1:3                         |
| Mouse IgM anti TRA-1-81                                    | Millipore                 | MAB4381          | 1:200                       |
| Rabbit IgG anti-alpha-1-fetoprotein                        | Dako                      | A0008            | 1:400                       |
| Goat IgG anti-FOXA2                                        | R&D Systems               | AF2400           | 1:50                        |
| Rabbit IgG anti-GATA4                                      | Santa Cruz Biotechnology  | sc-9053          | 1:50                        |
| Mouse IgG anti SMA                                         | Sigma                     | A5228            | 1:400                       |
| Mouse IgM anti-ASA                                         | Sigma                     | A2172            | 1:400                       |
| Mouse IgG anti-TUJ1                                        | Bio Legend                | MMS-435P         | 1:500                       |
| Rabbit IgG anti GFAP                                       | Dako                      | Z0334            | 1:500                       |
| Rabbit IgG anti NF200                                      | Sigma                     | N4142            | 1:100                       |
| Mouse IgG anti-Nerve growth factor (p75) receptor (ME20.4) | Advanced targeting System | AB-N07           | 1:100 (IF)<br>1:1000 (FACS) |
| Rabbit IgG anti-S100B                                      | Dako                      | Z0311            | 1:1000                      |
| Mouse IgG anti-AP2                                         | Thermo Scientific         | MA1-872          | 1:50                        |
| Rabbit IgG anti-Sox10                                      | Abcam                     | ac108408         | 1:50                        |
| Mouse IgG anti-MelanA                                      | Ventana                   | 790-2990         | 1:100                       |
| Rabbit IgG anti-MPZ                                        | Abcam                     | Ab31851          | 1:500                       |
| Rabbit IgG anti-PLP                                        | Abcam                     | ab28486          | 1:100                       |
| Rabbit IgG anti-GAP43                                      | Novus Biologicals         | NB300-143SS      | 1:500                       |
| Mouse IgG anti-Ki67                                        | Santa Cruz Biotechnology  | sc-23900         | 1:50                        |
| Mouse IgG anti-HNK1                                        | SIGMA                     | C6680            | 1:1000 (FACS)               |

## Extended Methodology

### iPSC characterization

Alkaline phosphatase activity was demonstrated using the Alkaline Phosphatase Blue Membrane Substrate Solution (Sigma). Briefly, iPSC were grown on top of mitotically inactivated human foreskin fibroblasts (HFF) during one week. Cells were fixed during 2 min in 3.7% paraformaldehyde and exposed to the substrate solution. After 20 min incubation in the dark, blue staining was evident in iPSC colonies. Detection of pluripotency-associated markers (nuclear: OCT4, SOX2 and NANOG; cytoplasmic: SSEA3, SSEA4 and Tra-1-81) was performed on iPSC cultured on HFF for 8 days and fixed with 4% paraformaldehyde (PFA). Then, samples were processed for immunocytochemistry. *In vitro* differentiation ability to the three germ layers was carried out through embryoid body (EB) formation. For endoderm, EBs were plated on 0.1% gelatin (Millipore) coated coverslips and cultured 3 weeks in KODMEM (Gibco) supplemented with 20% fetal bovine serum (Hyclone), 1x penicillin/streptomycin (Gibco), 1x Glutamax (Gibco), 0.05 mM 2-mercaptoethanol (Gibco), non essential aminoacids (Lonza). For mesoderm induction the same medium was used as before mentioned with the addition of 0.5 mM L-ascorbic acid (Sigma). Ectoderm differentiation was done culturing the EBs in suspension in N2B27 medium (Neurobasal:DMEM:F12 50:50 v/v, 1x N2 supplement, 1x B27 supplement, 1x Glutamax) supplemented with b-FGF as described (Sánchez-Danés, 2012). After 10 days in culture, EBs were plated on Matrigel (Corning) coated coverslips and cultured for additional three weeks in N2B27 medium without b-FGF. Differentiated cells were fixed with 4% PFA. Immunocytochemistry was performed by standard methods as previously reported (Martí, 2013). Primary antibodies used are listed in table S5. Secondary antibodies were of the Alexa Fluor series from Jackson Immuno Research and used between 1:250 and 1:500 dilution. Cell nuclei were counterstained with 0.5 µg/ml DAPI (Invitrogen). Images were acquired with an SP5 Leica confocal microscope. For karyotyping, iPSC were cultured on matrigel in the absence of HFF and treated with colcemide (Gibco) at a final concentration of 0.1 µg/mL and processed as described (Campos, 2009).

In the case of retroviral reprogrammed cell lines qPCR was performed to confirm the silencing of the transgenes. Sendai virus reprogrammed iPSC lines were subjected to qualitative PCR to check that they were vector-free at passage 10. The genetic expression of endogenous pluripotency-associated genes (*OCT4*, *NANOG*, *CRIP1* and *Rex1*) were confirmed by qPCR. Primers employed are listed in Table S4. For DNA methylation analysis, genomic DNA was extracted from cell pellets using QIAamp DNA Mini Kit (Qiagen 51304). DNA methylation analysis was performed with Methylamp DNA Modification kit (Epigentek P-1001-1) according to manufacturer's specifications. Oct4 and Nanog promoters were amplified by PCR using primers previously described in Freberg et al (2007), amplified in DH5a cells, purified and sequenced. Severe combined immunodeficient (SCID) beige mice (Charles River Laboratories) were used to generate teratomas from two iPSC line, 5PNFiPS(+/-) and 5PNFiPS(-/-). Animal assays were conducted following experimental procedures previously approved by the Institutional Ethics Committee on Experimental Animals, in full compliance with Spanish and European laws and regulations. Teratomas were stained with hematoxylin eosin and also the detection of the three germ layers was done by immunocytochemistry. Antibodies used are included in Table S5.

### DNA extraction

Genomic DNA from tumors was extracted using the Gentra Puregene Kit (Qiagen, Chatsworth, CA) following manufacturer's instructions, after tissue homogenization using Tissue Lyser (Qiagen). Genomic DNA from primary cells and iPSCs was extracted using Promega Maxwell 16 system following manufacturer's instructions.

### NF1 genetic analysis

*NF1* germline and somatic mutations were detected by *NF1* cDNA Sanger sequencing, by gDNA sequencing using the I2HCP NGS custom panel (Castellanos *et al*, 2017) and MLPA from cultured PNF-derived Schwann cells treated with 250 µg/ml puromycin (Sigma) or PNFs DNA following Genetic Diagnostics for Hereditary Cancer Unit protocols. Germline mutations were confirmed by DNA Sanger sequencing from cultured PNF-derived fibroblast cells. Loss of heterozygosity of NF1 locus was detected by Microsatellite multiplex PCR analysis (MMPA) of chromosome 17 (Garcia-Linares *et al*, 2012). Reference sequence used was GeneBank: NG\_009018\_1, NM\_000267\_3, NP\_000258.1. For intragenic deletions we used GeneBank: NM\_001042492.2.

### SNP-array analysis

SNP-array analysis was performed on selected samples using Illumina HumanOmniExpress v1 BeadChips (730,525 SNPs). Raw data was processed with Illumina Genome Studio v2011.1 with the Genotyping module v1.9.4 to extract B Allele frequency (BAF) and log R ratio (LRR) and then analyzed with the R package ASCAT (Van Loo *et al*, 2010) to obtain loss of heterozygosity (LOH) and allele specific copy

number (CN) profiles. All samples were analyzed independently and treated as unpaired samples, using the germline genotype prediction functionality from ASCAT.

#### Exome sequencing

Exome was captured using Agilent SureSelect Human All Exon V5 kit (Agilent, Santa Clara, CA, US) according to the manufacturer's instructions and sequenced in a HiSeq instrument (Illumina) producing 100-base long paired-end reads. Reads were aligned to the hs37d5 reference genome using BWA MEM (Li H 2013) (bwa-0.7.13). After that, duplicates were marked using Picard (v2.0.1) and the Genome Analysis Toolkit (GATK) (McKenna *et al*, 2010) (v.3.4.46) was used for local realignment around indels. GATK's Mutect2 (Cibulskis *et al*, 2013) was used to detect somatic variants specific to primary tumors, SC and iPSC with respect to their associated fibroblasts. Variants were annotated using annovar (Wang *et al*, 2010)(v20160201), filtered using custom R scripts and further validated by manual inspection.

#### Data visualization

Genomic plots were created with the R/Bioconductor package karyoploteR (Gel & Serra, 2017) and additional custom R scripts. Graphs were created with Graphpad Prism 7.0.

#### RT-qPCR analysis

Total RNA was extracted from cultured cells using the 16 LEV simplyRNA Purification Kit, from Maxwell technology following manufacturer's instructions. RNA (0,5 µg) was reverse-transcribed using the Superscript III reverse transcriptase enzyme (Life technologies) according to manufacturer's instructions. Quantitative polymerase chain reaction (qPCR) was performed with Roche Universal Probe Library (UPL) technology and analyzed using the Light-Cycler® 480 Real-Time PCR System (Roche Diagnostics). Gene expression was normalized to two selected reference genes (*EP300* and *TBP*) and expressed as Normalized Relative Expression (NRE). Primer sequences used are listed in Table S4. A Microsoft Excel spreadsheet was used to analyze qPCR data for relative expression calculations (Terribas *et al*, 2013).

#### Western Blotting

Cells were washed with chilled PBS twice and lysed with RIPA buffer (50 mM Tris-HCl (pH 7.4), 150 mM NaCl, 1mM EDTA, 0.5% Igepal CA-630) supplemented with 3mM DTT (Roche), 1mM PMSF (Fluka), 1mM sodium orthovanadate (Sigma), 5mM NaF (Honeywell), 10 µg/ml leupeptin (Sigma), 5µg/ml aprotinin (Sigma) and 1xPhosSTOP (Roche). Lysates were boiled with 1X Laemmli buffer and 90 µg of protein was subjected to SDS-PAGE and transferred onto PVDF membranes (18 hours 90mA at 4°C). Membranes were blocked with Odyssey Blocking Buffer (PBS)(LI-COR) and incubated with rabbit anti-NF1 Antibody (Bethyl laboratories) at 4°C overnight; and with mouse anti- $\alpha$ tubulin (Sigma-Aldrich) 1 h at room temperature. Membranes were then incubated with IRDye 680LT and IRDye 800CW secondary antibodies (1:25,000 and 1:15,000, respectively; LI-COR) for 1 h at room temperature and scanned using the Odyssey Infrared Imaging System (LI-COR).

#### Immunocytochemistry and flow cytometry

For immunofluorescence, cells were fixed in 4% para-formaldehyde in PBS for 15min at RT, permeabilized with 0.1% Triton-X 100 in PBS for 10 min at RT, blocked in 10% FBS in PBS for 15 min at RT and stained with the primary antibodies (Table S4) overnight at 4°C. Secondary antibodies were Alexa Fluor 488- and Alexa Fluor 568- (Invitrogen). Nuclei were stained with DAPI and images captured using LEICA DMIL6000 and LASAF software. Confocal images from spheres were captured using AxioObserver Z1 Confocal LSM 710, and ZEN Black 2012 software. For flow cytometry assays, cells were dissociated with accutase, resuspended in 0.1% BSA in PBS, incubated for 30 min on ice with unconjugated primary antibody p75 and detected with Alexa Fluor 568-conjugated secondary antibodies, following incubation for 30 min on ice with unconjugated primary antibody Hnk1 and detected with Alexa Fluor 488-conjugated secondary antibodies. Cells were analyzed by flow cytometry using BD LSR Fortessa SORP and BD FACSDiva 6.2 software.

#### Proliferation Assay (Click-iT Edu assay)

Two hundred thousand iPSCs (ES4, FiPS and iPSC) were plated on matrigel-coated 6-well plates, and fed daily with mTESR medium. After 72h cells were treated with 20 µM EdU for 2 hours, fixed, permeabilized and click labeled with Alexa Fluor 488 azide using Click-iT Plus EdU Flow Cytometry Assay Kits (Thermo Fisher) according to the manufacturer protocol. Cells were also stained with propidium iodide to detect DNA content. Data was collected and analyzed using an BD LSR Fortessa SORP and BD FACSDiva 6.2 software.

### Scratch assay

0.5x10<sup>6</sup> NC cells were plated onto matrigel-coated 6-well dishes. When cells reached confluence a scratch area was created using a sterile tip. Medium was replaced and migration was measured after 6 and 24 hours. To obtain data in cell migration 9 fields covering the scratch were imaged with a 10x lens at 0, 6 and 24 hours after the scratch. The 9 images were joined using tilescan tool from the LASAF software (Leica).

### In vitro Myelination assay

*In vitro* myelination assay was performed as described in Kim H-S et al (Kim *et al*, 2017) co-culturing Rat Dorsal Root Ganglion (DRG) neurons (Innoprot, Spain) with SCP (7 days differentiation)-FiPS, for 30 days.

### Statistical Analyses

Statistical analysis was carried out using GraphPad Prism software v7. For multiple group comparisons, a two-tailed unpaired t test was performed. The number of biological replicates (n) for each experiment and average  $\pm$  SEM are indicated when applicable, and statistical significance is indicated by \*p < 0.05, \*\*p < 0.01, and \*\*\*p < 0.001.

### References

- Campos PB, Sartore RC, Abdalla SN, Rehen SK. Chromosomal spread preparation of human embryonic stem cells for karyotyping E *J Vis Exp*. 2009 Sep 4;(31)
- Castellanos E, Gel B, Rosas I, Tornero E, Santín S, Pluvinet R, Velasco J, Sumoy L, del Valle J, Perucho M, Blanco I, Navarro M, Brunet J, Pineda M, Feliubadaló L, Capellá G, Lázaro C & Serra E (2017) A comprehensive custom panel design for routine hereditary cancer testing: preserving control, improving diagnostics and revealing a complex variation landscape. *Sci. Rep.* **7**: 39348
- Cibulskis K, Lawrence MS, Carter SL, Sivachenko A, Jaffe D, Sougnez C, Gabriel S, Meyerson M, Lander ES & Getz G (2013) Sensitive detection of somatic point mutations in impure and heterogeneous cancer samples. *Nat. Biotechnol.* **31**: 213–219
- Freberg CT, Dahl JA, Timoskainen S, Collas P. Epigenetic reprogramming of OCT4 and NANOG regulatory regions by embryonal carcinoma cell extract. *Mol Biol Cell*. 2007 May;18(5):1543-53. Epub 2007 Feb 21.
- García-Linares C, Mercadé J, Gel B, Biayna J, Terribas E, Lázaro C & Serra E (2012) Applying microsatellite multiplex PCR analysis (MMPA) for determining allele copy-number status and percentage of normal cells within tumors. *PLoS One* **7**: e42682
- Gel B & Serra E (2017) karyoploteR: an R/Bioconductor package to plot customizable genomes displaying arbitrary data. *Bioinformatics*: 31–33
- Kim H-S, Lee J, Lee DY, Kim Y-D, Kim JY, Lim HJ, Lim S & Cho YS (2017) Schwann Cell Precursors from Human Pluripotent Stem Cells as a Potential Therapeutic Target for Myelin Repair. *Stem Cell Reports* **8**: 1714–1726
- Martí M, Mulero L, Pardo C, Morera C, Carrió M, Laricchia-Robbio L, Esteban CR, Izpisua Belmonte JC. Characterization of pluripotent stem cells. *Nat. Protoc.* 2013 Feb;8(2):223-53. doi: 10.1038/nprot.2012.154. Epub 2013 Jan 10.
- McKenna A, Hanna M, Banks E, Sivachenko A, Cibulskis K, Kernytsky A, Garimella K, Altshuler D, Gabriel S, Daly M & DePristo MA (2010) The Genome Analysis Toolkit: A MapReduce framework for analyzing next-generation DNA sequencing data. *Genome Res.* **20**: 1297–1303
- Sánchez-Danés A, Richaud-Patin Y, Carballo-Carbajal I, Jiménez-Delgado S, Caig C, Mora S, Di Guglielmo C, Ezquerro M, Patel B, Giralt A, Canals JM, Memo M, Alberch J, López-Barneo J, Vila M, Cuervo AM, Tolosa E, Consiglio A, Raya A. Disease-specific phenotypes in dopamine neurons from human iPS-based models of genetic and sporadic Parkinson's disease *EMBO Mol Med.* 2012 May;4(5):380-95. doi: 10.1002/emmm.201200215. Epub 2012 Mar 8.
- Terribas E, García-Linares C, Lázaro C & Serra E (2013) Probe-based quantitative PCR assay for detecting constitutional and somatic deletions in the NF1 gene: application to genetic testing and tumor analysis. *Clin. Chem.* **59**: 928–37
- Van Loo P, Nordgard SH, Lingjaerde OC, Russnes HG, Rye IH, Sun W, Weigman VJ, Marynen P, Zetterberg A, Naume B, et al. (2010) Allele-specific copy number analysis of tumors. *Proc. Natl. Acad. Sci.* **107**: 16910–16915
- Wang K, Li M & Hakonarson H (2010) ANNOVAR: functional annotation of genetic variants from high-throughput sequencing data. *Nucleic Acids Res.* **38**: e164–e164
